# Supplementary material for: The Protective Effects of Danggui-Baizhu-Tang on High-Fat Diet-Induced Obesity in Mice by Activating Thermogenesis
Source: PubMed Central journal article supplement (PMC6143821; doi:10.3389/fphar.2018.01019), 2018-09-05
Supplement: Table_1.pdf [file Table_1.pdf]

**Supplementary Table 1**  
**Main Components and Content Assay of Danggui-Baizhu-Tang**

| <b>Chinese herb</b>                | <b>Content assay</b> | <b>Pharmacopoeia standard</b> | <b>Test result</b> |
|------------------------------------|----------------------|-------------------------------|--------------------|
| Poria                              | Pachyman             | $\geq 0.418\%$                | 0.8%               |
| Radix Angelicae sinensis           | Volatile oil         | $\geq 0.4\%$                  | 0.6%               |
|                                    | Ferulic acid         | $\geq 0.05\%$                 | 0.2%               |
| Rhizoma Atractylodis Macrocephalae | Atractylenolide III  | $\geq 0.01\%$                 | 0.03%              |
| Fructus Aurantii Immaturus         | Synephrine           | $\geq 0.3\%$                  | 1.08%              |
